# Supplementary figures and images for: Novel activities by ebolavirus and marburgvirus interferon antagonists revealed using a standardized in vitro reporter system
Source: PubMed Central journal article supplement — Virology. Author manuscript; Available in PMC 2024 Oct 30. (PMC11524407; doi:10.1016/j.virol.2016.11.015), 2016-12-06

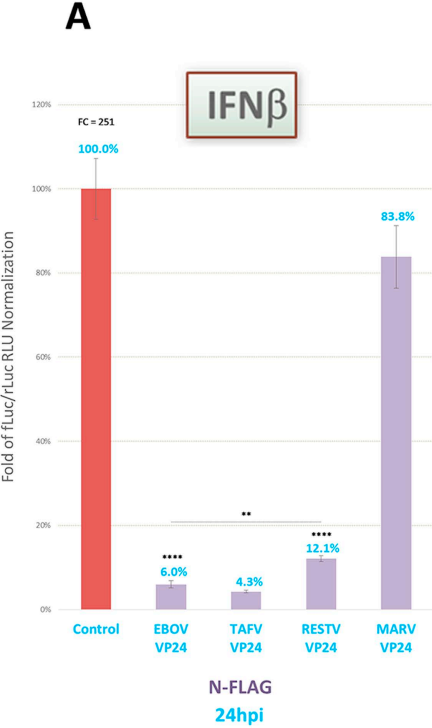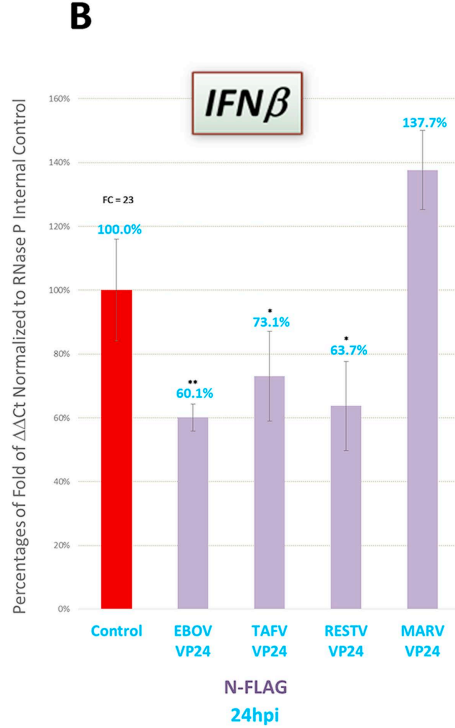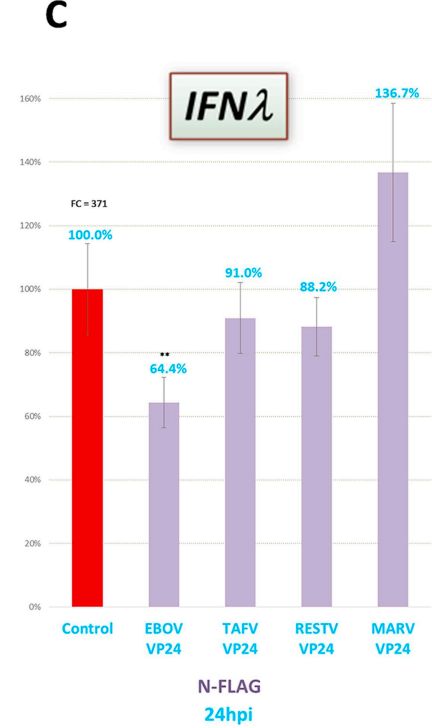

**+ SeV**

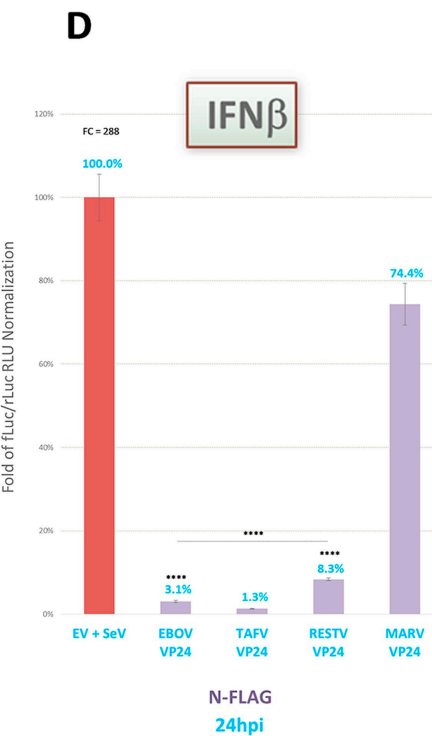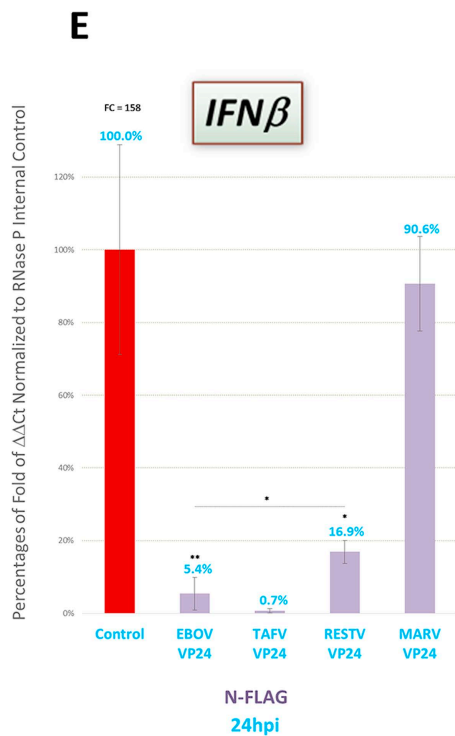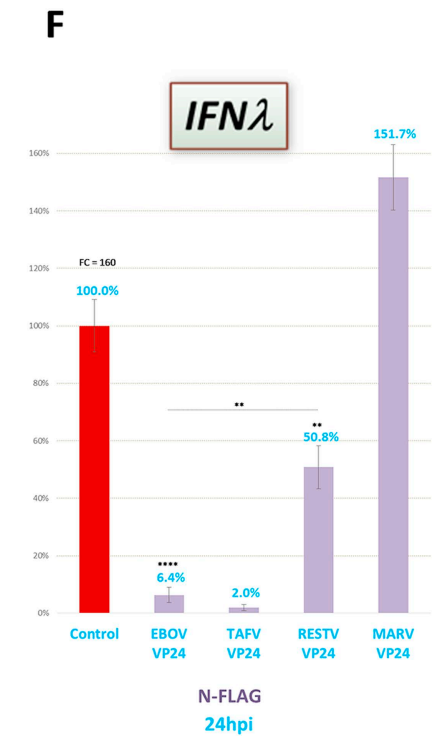

**+ RIG-I**

Supplement: NIHMS1024610-supplement-Supp_Fig_2.pdf [file NIHMS1024610-supplement-Supp_Fig_2.pdf]

**A**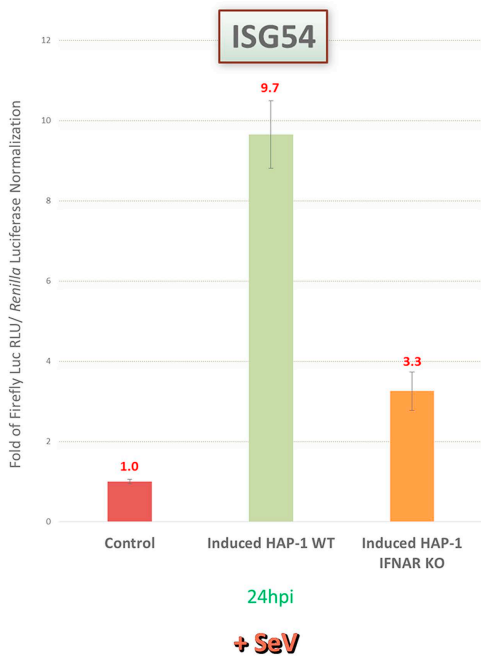**B**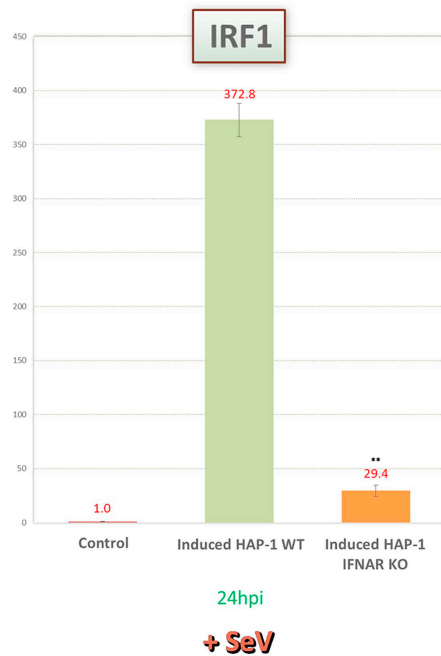**C**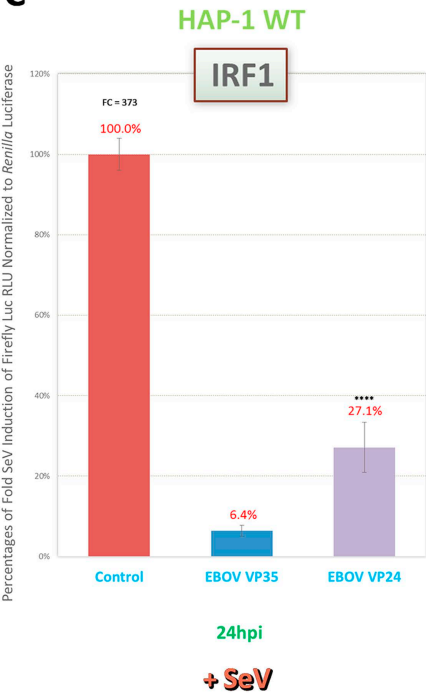**D**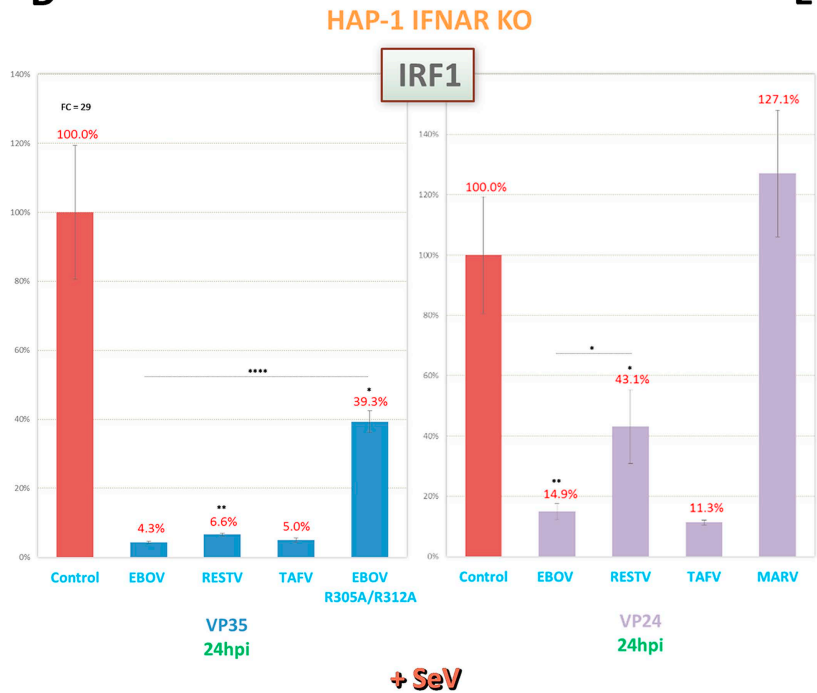**E**

Supplement: NIHMS1024610-supplement-Supp_Fig_3.pdf [file NIHMS1024610-supplement-Supp_Fig_3.pdf]
